# Supplementary material for: An Algorithm for Improving Email Security on the Android Operating System in the Industry 4.0 Era
Source: Hindawi journal article supplement (doi:10.1155/2021/4690611), 2021-11-20
Supplement: f1 [file 4690611.f1.zip]

Archive with 3 entries (3 files):
- 4690611.f1/Supplementary Material 1.docx
- 4690611.f1/Supplementary Material 2.docx
- 4690611.f1/Supplementary Material 3.docx
