# Supplementary material for: An Algorithm for Improving Email Security on the Android Operating System in the Industry 4.0 Era
Source: Hindawi journal article supplement (doi:10.1155/2021/4690611), 2021-11-20
Supplement: f1 [file 4690611.f1.zip › 4690611.f1/Supplementary Material 1.docx]

| Research Questionnaire ONE (Scenario 1) |
| --- |

My Name is KISEMBO MOSES ISAAC Student Reg. No BU/GS16/MCF/6 Student of Busitema University carrying out Research as a requirement for the award of Masters of Computer Forensics.

Confidentiality is a measure undertaken to prevent sensitive information from reaching the unauthorized people, while making sure that the authorized people can get it. Email communication is widely adopted as a form of official communication but the confidentiality of the email at the user’s end point (email client) is inadequate as there are growing cases of email hacking. This research seeks to develop a confidentiality algorithm that will be used to ensure emails we send can be wiped off from the receiver’s inbox after a set period determined by the sender.

The respondent’s inputs to this questionnaire will provide vital information on the existence of the problem and in designing an algorithm (computer procedure) to provide solution to the problem.

| POSITION: ………………………………………………………….  DEPARTMENT:……………………………………………………..  ORGANISATION: …………………………………………………..  SEX:…….…………………………………………………………….  PERIOD AT THE INSTITUTION:…………………………………... | | | | | |
| --- | --- | --- | --- | --- | --- |
| GUIDE:   1. IF YOU ARE AN EMAIL USER AND ALSO AN ICT EMAIL TECHNICAL SUPPORT PERSON, PLEASE COMPLETE BOTH PART A AND B 2. IF YOU ARE ONLY AN EMAIL USER PLEASE COMPLETE ONLY PARTA | | | | | |
| USE A CROSS (LETTER X) TO MARK YOUR PREFERRED CHOICE | Strongly Agree | Agree | Uncertain | Disagree | Strongly Disagree |
| PART A  Please choose the correct answer in your opinion  Extent of email use forms of information shared on mail, the kinds of security measures used. |  |  |  |  |  |
| 1. I use email as a means of communication in my office or for personal communication |  |  |  |  |  |
| 1. Some or most of my email communication conveyed or conveys company or personal confidential information |  |  |  |  |  |
| 1. Apart from password, I use another security measure to grant access to my email account |  |  |  |  |  |
| 1. I have email messages shared that I treat as old mails |  |  |  |  |  |
| 1. There are emails that are no longer of value in both my sent and received inbox. |  |  |  |  |  |
| 1. I have previously shared a transaction related information over mail. The information shared has been in my mail box up to now |  |  |  |  |  |
| 1. I often delete emails that are no longer important from my inbox |  |  |  |  |  |
| 1. I always ask my email correspondents to delete sensitive mails I send to them to avoid future misuse |  |  |  |  |  |
| 1. I use my android phone to access my email account and sometimes share the phone with other friends/relatives whenever they want to make a call |  |  |  |  |  |
| 1. Majority of my friends who use smart phones use android and access mails over those mails |  |  |  |  |  |

| PART B  How good is the technical security measures being used to protect access to the mail inbox |  |  |  |  |  |
| --- | --- | --- | --- | --- | --- |

| 1. I support email users to configure access configuration |  |  |  |  |  |
| --- | --- | --- | --- | --- | --- |
| 1. I have configured email access to my staff on their emails |  |  |  |  |  |
| 1. There is an additional access control to staff email apart from password |  |  |  |  |  |
| 1. Email login session in the android is set to expire login sessions to ensure that users put their password whenever the want to access their email again |  |  |  |  |  |
| 1. The company has control of the staff smart phones, such that, possible compromise/theft of the phone can be acted on by wiping email content in the phone remotely |  |  |  |  |  |
| 1. There is an existing confidentiality technique that allows our staff emails to remain confidential and private, even if, their emails are accessed illegally |  |  |  |  |  |
| 1. Staff accessing office mail while out of office causes more risks and we do not allow |  |  |  |  |  |
| 1. Email is the only officially accepted form of electronic communication in our organization and any information shared via office email is treated as authentic |  |  |  |  |  |
| 1. There is usage of private mails to make official communications, especially under conditions where official mail cannot deliver the requirement (e.g. can be attachment size) |  |  |  |  |  |
| 1. Email Security is our company challenge |  |  |  |  |  |

Thank you for your time

| RESEARCH QUESTIONNAIRE TWO (Scenario 2) |
| --- |

My Name is KISEMBO MOSES ISAAC Student Reg. No BU/GS16/MCF/6 Student of Busitema University carrying out Research as a requirement for the award of Masters of Computer Forensics.

Confidentiality is a measure undertaken to prevent sensitive information from reaching the unauthorized people, while making sure that the authorized people can get it. Email communication is widely adopted as a form of official communication but the confidentiality of the email at the user’s end point (email client) is inadequate as there are growing cases of email hacking. This research seeks to develop a confidentiality algorithm that will be used to ensure emails we send can be wiped off from the receiver’s inbox after a set period determined by the sender.

The respondent’s inputs to this questionnaire will provide vital information on the evaluation of the application you have tested which has the described algorithm.

| DEPARTMENT: (ICT or NOT-ICT)………………………………………  ORGANISATION: …………………………………………………..  SEX:…….…………………………………………………………….  PERIOD AT THE INSTITUTION:…………………………………... | | | | | |
| --- | --- | --- | --- | --- | --- |
| GUIDE:  USE A CROSS (LETTER X) TO MARK YOUR PREFERRED CHOICE | | | | | |
|  | Strongly Agree | Agree | Uncertain | Disagree | Strongly Disagree |
| 1. I was able to set message expiration time and the message sent lasted in the receiver's inbox only up to the time of expiration set |  |  |  |  |  |
| 1. I could not send a message without setting expiry information |  |  |  |  |  |
| 1. With this algorithm solution to confidentiality, there can be reduced impact of hacked email |  |  |  |  |  |
| 1. I understand the benefit of this solution as I understand Password and I feel it can solve some or most of the challenges passwords have |  |  |  |  |  |
| 1. There are no better existing solutions that can replace this algorithm |  |  |  |  |  |
| 1. My overall assessment of the algorithm is excellent |  |  |  |  |  |
| 1. I recommend this solution as a way to ensure confidentiality of emails shared |  |  |  |  |  |
| 1. I would rate this project as important |  |  |  |  |  |
| 1. This algorithm has changed my perspective of confidentiality |  |  |  |  |  |
| 1. I would rate the structure and format of this algorithm as excellent |  |  |  |  |  |
| 1. The process showed reliability and brought a feeling of confidentiality control |  |  |  |  |  |
| 1. The email client application was user friendly |  |  |  |  |  |

Thank you for your time
