# Supplementary material for: An Algorithm for Improving Email Security on the Android Operating System in the Industry 4.0 Era
Source: Hindawi journal article supplement (doi:10.1155/2021/4690611), 2021-11-20
Supplement: f1 [file 4690611.f1.zip › 4690611.f1/Supplementary Material 2.docx]

**
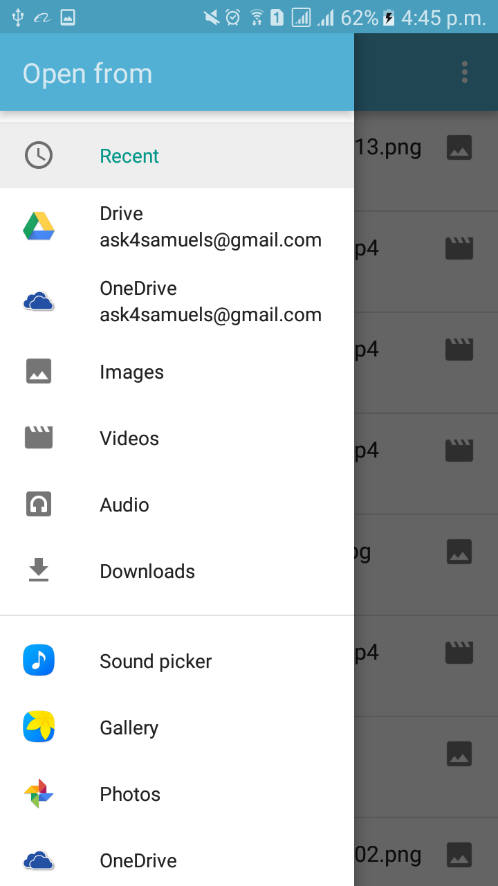
Security test demo on installed data wipe application software**


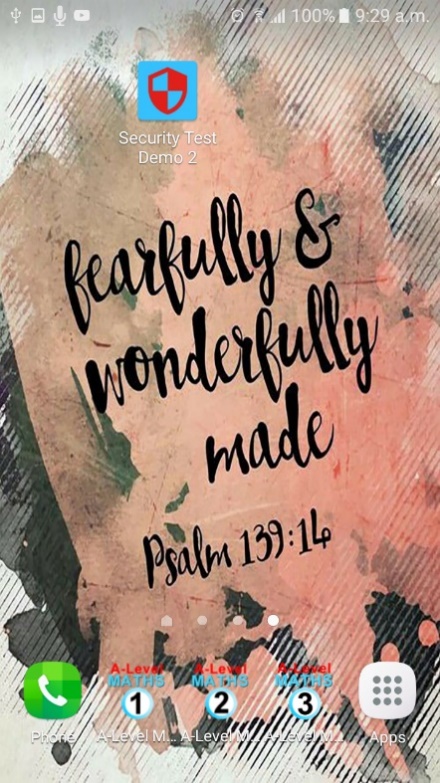


**Opening the application and the attachment upload**

**Messaging Menu on smartphone**

**
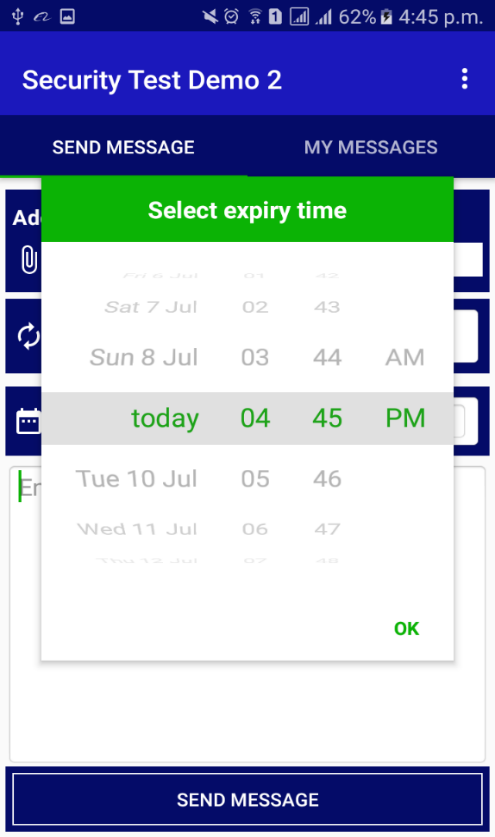
**


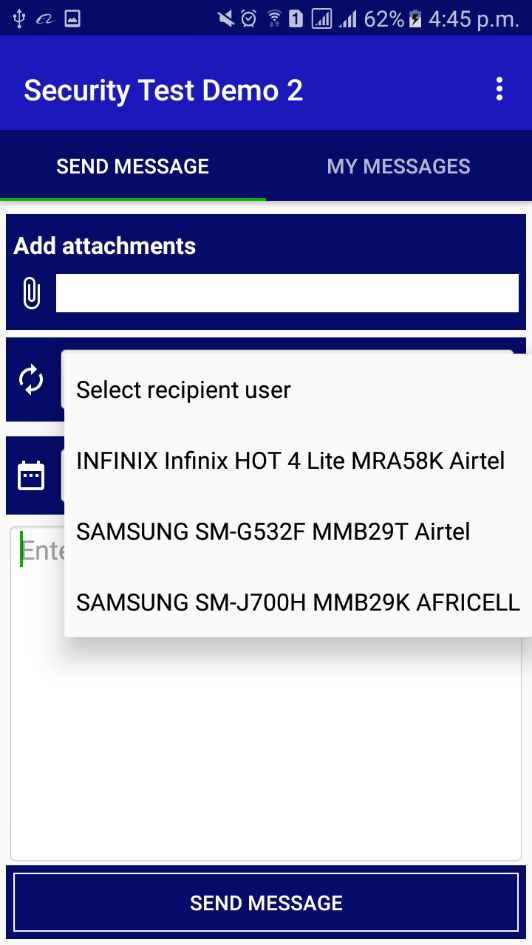


**Expiry time selection**

**Recipient selection**


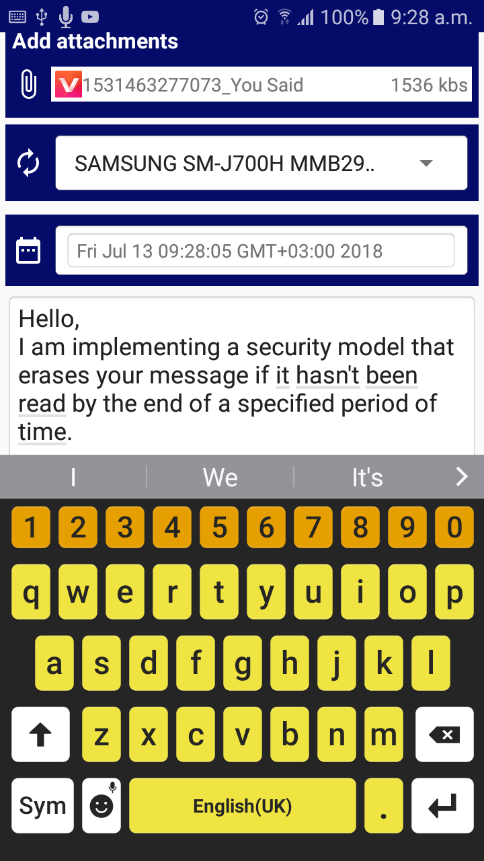
**
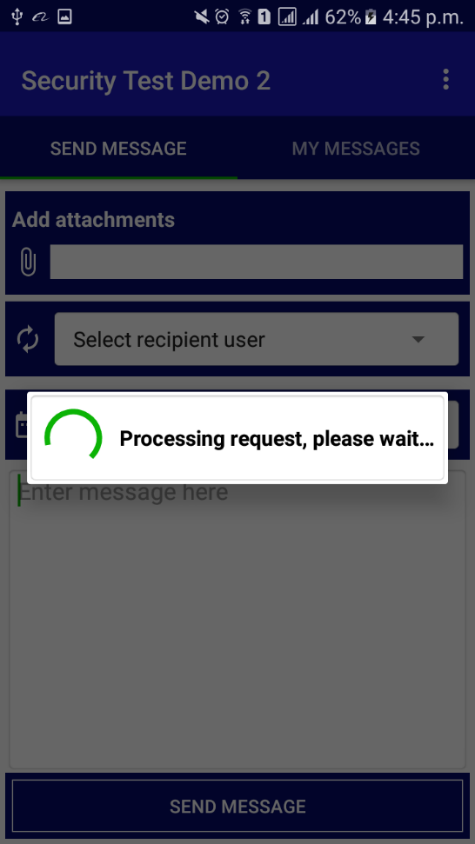
**

**Message typing**

**Refreshing Contacts**

**
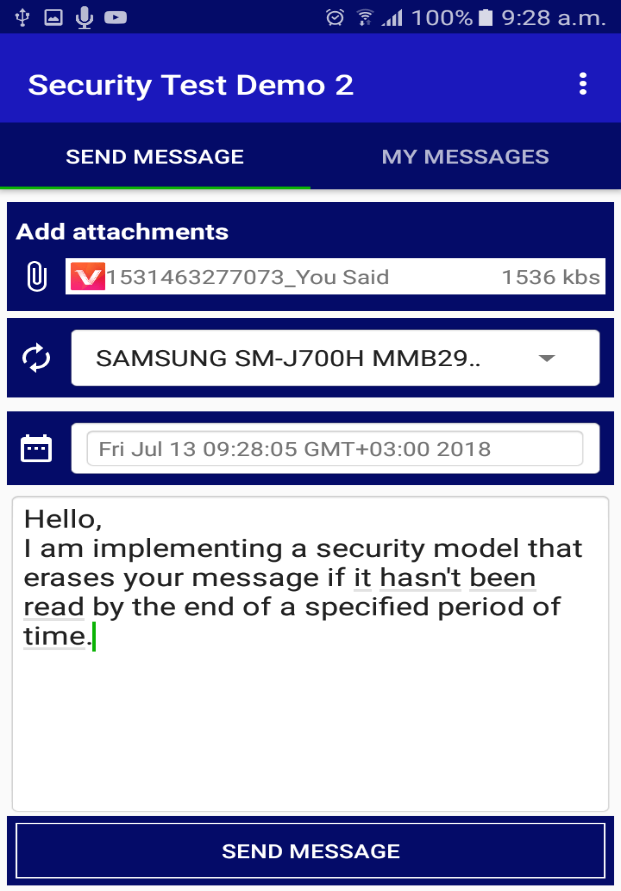
**

**Message Sending**
