# Supplementary material for: An Algorithm for Improving Email Security on the Android Operating System in the Industry 4.0 Era
Source: Hindawi journal article supplement (doi:10.1155/2021/4690611), 2021-11-20
Supplement: f1 [file 4690611.f1.zip › 4690611.f1/Supplementary Material 3.docx]

**Statistic Analysis**

1. **Scenario 1 Survey**

| **Reliability Statistics** | | |
| --- | --- | --- |
| Cronbach's Alpha | Cronbach's Alpha Based on Standardized Items | N of Items |
| .722 | .742 | 20 |

| **Item Statistics** | | | |
| --- | --- | --- | --- |
|  | Mean | Std. Deviation | N |
| A3 | 3.4118 | 1.17574 | 17 |
| A4 | 3.7059 | 1.10480 | 17 |
| A5 | 3.9412 | 1.29762 | 17 |
| A8 | 2.5294 | 1.37467 | 17 |
| A9 | 4.3529 | .86177 | 17 |
| A10 | 4.4706 | .62426 | 17 |
| B1 | 4.0000 | 1.06066 | 17 |
| B2 | 3.4706 | 1.12459 | 17 |
| B3 | 2.9412 | 1.29762 | 17 |
| B4 | 2.6471 | 1.57881 | 17 |
| B5 | 2.0588 | 1.19742 | 17 |
| B7 | 2.8824 | 1.26897 | 17 |
| B9 | 3.2353 | 1.39326 | 17 |
| B10 | 3.2353 | 1.30045 | 17 |
| B6 | 3.1176 | 1.45269 | 17 |
| A6 | 3.3529 | 1.49755 | 17 |
| A7 | 2.9412 | 1.39062 | 17 |
| B8 | 3.9412 | 1.14404 | 17 |
| A1 | 4.8235 | .39295 | 17 |
| A2 | 4.6471 | .49259 | 17 |

| **Item-Total Statistics** | | | | | |
| --- | --- | --- | --- | --- | --- |
|  | Scale Mean if Item Deleted | Scale Variance if Item Deleted | Corrected Item-Total Correlation | Squared Multiple Correlation | Cronbach's Alpha if Item Deleted |
| A3 | 66.2941 | 89.721 | -.006 | . | .736 |
| A4 | 66.0000 | 81.500 | .414 | . | .702 |
| A5 | 65.7647 | 88.066 | .050 | . | .734 |
| A8 | 67.1765 | 78.529 | .433 | . | .697 |
| A9 | 65.3529 | 87.368 | .178 | . | .720 |
| A10 | 65.2353 | 85.441 | .445 | . | .708 |
| B1 | 65.7059 | 81.346 | .444 | . | .700 |
| B2 | 66.2353 | 83.941 | .280 | . | .713 |
| B3 | 66.7647 | 77.566 | .513 | . | .690 |
| B4 | 67.0588 | 78.809 | .345 | . | .707 |
| B5 | 67.6471 | 80.118 | .439 | . | .698 |
| B7 | 66.8235 | 84.404 | .213 | . | .719 |
| B9 | 66.4706 | 80.390 | .346 | . | .706 |
| B10 | 66.4706 | 79.890 | .404 | . | .701 |
| B6 | 66.5882 | 82.132 | .256 | . | .716 |
| A6 | 66.3529 | 80.743 | .297 | . | .712 |
| A7 | 66.7647 | 79.566 | .382 | . | .703 |
| B8 | 65.7647 | 89.691 | -.001 | . | .735 |
| A1 | 64.8824 | 88.360 | .332 | . | .716 |
| A2 | 65.0588 | 88.434 | .248 | . | .718 |

| **Scale Statistics** | | | |
| --- | --- | --- | --- |
| Mean | Variance | Std. Deviation | N of Items |
| 69.7059 | 90.971 | 9.53785 | 20 |

2) **Scenario 2 Survey**

| Cronbach's Alpha | Cronbach's Alpha Based on Standardized Items | N of Items |
| --- | --- | --- |
| .706 | .701 | 12 |

| **Item Statistics** | | | |
| --- | --- | --- | --- |
|  | Mean | Std. Deviation | N |
| R1 | 4.39 | 1.022 | 31 |
| R3 | 3.10 | 1.326 | 31 |
| R7 | 3.65 | 1.603 | 31 |
| R8 | 3.42 | 1.361 | 31 |
| R10 | 3.71 | 1.189 | 31 |
| R11 | 3.48 | 1.235 | 31 |
| R12 | 3.81 | 1.493 | 31 |
| R9 | 3.65 | 1.473 | 31 |
| R6 | 3.68 | 1.326 | 31 |
| R5 | 4.13 | .991 | 31 |
| R2 | 3.29 | 1.296 | 31 |
| R4 | 2.97 | 1.516 | 31 |

| **Item-Total Statistics** | | | | | |
| --- | --- | --- | --- | --- | --- |
|  | Scale Mean if Item Deleted | Scale Variance if Item Deleted | Corrected Item-Total Correlation | Squared Multiple Correlation | Cronbach's Alpha if Item Deleted |
| R1 | 38.87 | 55.716 | .230 | .359 | .701 |
| R3 | 40.16 | 55.606 | .147 | .662 | .714 |
| R7 | 39.61 | 44.578 | .613 | .906 | .638 |
| R8 | 39.84 | 54.873 | .176 | .462 | .711 |
| R10 | 39.55 | 51.656 | .421 | .624 | .677 |
| R11 | 39.77 | 55.181 | .194 | .656 | .706 |
| R12 | 39.45 | 45.523 | .621 | .889 | .640 |
| R9 | 39.61 | 55.512 | .118 | .284 | .721 |
| R6 | 39.58 | 48.185 | .560 | .800 | .654 |
| R5 | 39.13 | 54.116 | .354 | .565 | .687 |
| R2 | 39.97 | 53.432 | .272 | .509 | .696 |
| R4 | 40.29 | 49.546 | .394 | .544 | .679 |

| **Scale Statistics** | | | |
| --- | --- | --- | --- |
| Mean | Variance | Std. Deviation | N of Items |
| 43.26 | 60.265 | 7.763 | 12 |
